# Supplementary material
Source: PubMed Central journal article supplement (PMC2998984)
Supplement: supp_cwq134_cwq134supp_tables.pdf [file supp_cwq134_cwq134supp_tables.pdf]

# Supplementary Tables I & II

High Sensitivity O-glycomic Analysis of Mice Deficient  
in Core 2  $\beta$ 1,6-N-acetylglucosaminyltransferases

Ismail et al. 2010  
Glycobiology

**Supplementary Table I. O-glycan structures from the stomach of wild type and knockout mice.** This table summarises all structures  $[M+Na]^+$  observed in the MALDI-TOF-MS spectra of stomach tissues from wild type, C2GnT2 knockout, C2GnT3 knockout and C2GnT triple knockout mice.

| <i>m/z</i> | Structures |           |           |                 | <i>m/z</i> | Structures |             |           |                 |
|------------|------------|-----------|-----------|-----------------|------------|------------|-------------|-----------|-----------------|
|            | WT         | C2GnT2 KO | C2GnT3 KO | C2GnT Triple KO |            | WT         | C2GnT2 KO   | C2GnT3 KO | C2GnT Triple KO |
| 534        |            |           |           |                 | 1473       |            |             |           | ND              |
| 708        |            |           |           |                 | 1505       |            | 2<br>2<br>3 | ND        |                 |
| 738        | ND         |           | ND        |                 | 1518       | ND         |             | ND        |                 |
| 779        |            |           |           |                 | 1535       |            | ND          |           |                 |
| 895        |            |           |           |                 | 1578       |            |             |           | ND              |
| 912        |            |           |           |                 | 1589       | ND         |             | ND        |                 |
| 925        |            |           |           | ND              | 1606       |            |             |           |                 |
| 953        |            |           |           |                 | 1647       |            | ND          |           |                 |
| 983        |            |           |           |                 | 1677       |            |             |           |                 |
| 1024       |            |           |           |                 | 1692       | ND         | ND          | ND        |                 |
| 1086       | ND         | ND        | ND        |                 | 1709       | ND         | ND          | ND        |                 |
| 1140       | ND         |           | ND        | ND              | 1780       |            |             |           |                 |
| 1157       |            |           |           |                 | 1810       | ND         | ND          | ND        |                 |
| 1187       |            |           |           |                 | 1852       |            |             |           | ND              |
| 1198       |            |           |           |                 | 1882       |            | 4<br>4      |           | ND              |
| 1228       |            |           |           |                 | 1922       |            |             |           | ND              |
| 1256       | ND         |           |           |                 | 1955       | ND         | ND          | ND        |                 |
| 1286       | ND         | ND        |           | ND              |            |            |             |           |                 |
| 1269       |            | ND        | ND        | ND              |            |            |             |           |                 |
| 1316       |            |           |           | ND              |            |            |             |           |                 |
| 1331       |            |           |           |                 |            |            |             |           |                 |
| 1361       |            |           |           |                 |            |            |             |           |                 |
| 1374       |            |           |           | ND              |            |            |             |           |                 |
| 1402       |            |           |           |                 |            |            |             |           |                 |
| 1432       |            |           |           |                 |            |            |             |           |                 |

| m/z  | Structures |           |           |                 |
|------|------------|-----------|-----------|-----------------|
|      | WT         | C2GnT2 KO | C2GnT3 KO | C2GnT Triple KO |
| 1985 | ND         | ND        | ND        |                 |
| 2026 |            | ND        |           | ND              |
| 2056 |            |           |           |                 |
| 2097 |            |           |           | ND              |
| 2127 |            | ND        |           | ND              |
| 2230 |            |           |           |                 |
| 2243 | ND         | ND        | ND        |                 |
| 2271 |            | ND        |           | ND              |
| 2404 |            |           |           |                 |
| 2578 |            | ND        |           | ND              |
| 2617 |            | ND        |           | ND              |
| 2853 |            | ND        |           | ND              |
| 3272 |            | ND        | ND        | ND              |
| 3027 |            | ND        |           | ND              |
| 3098 |            | ND        |           | ND              |
| 3126 |            | ND        |           | ND              |
| 3302 |            | ND        |           | ND              |
| 3476 |            | ND        |           | ND              |

WT; wild type mice, C2GnT2 KO; C2GnT2 knockout mice, C2GnT3 KO, C2GnT3 knockout mice, C2GnT triple KO: C2GnT triple knockout mice, ND; not detected.

Key: GalNAc GlcNAc HexNAc Gal Man Fuc NeuAc NeuGc

**Supplementary Table II. O-glycan structures from the small intestine of wild type and knockout mice.** This table summarises all structures  $[M+Na]^+$  observed in the MALDI-TOF-MS spectra of small intestine tissues from wild type, C2GnT2 knockout, C2GnT3 knockout and C2GnT triple knockout mice.

| m/z  | Structures |           |           |                 | m/z  | Structures |           |           |                 |
|------|------------|-----------|-----------|-----------------|------|------------|-----------|-----------|-----------------|
|      | WT         | C2GnT2 KO | C2GnT3 KO | C2GnT Triple KO |      | WT         | C2GnT2 KO | C2GnT3 KO | C2GnT Triple KO |
| 534  |            |           |           |                 | 1432 |            |           |           |                 |
| 708  |            |           |           |                 | 1473 |            |           |           | ND              |
| 779  |            |           |           |                 | 1501 | ND         |           |           | ND              |
| 895  |            |           |           |                 | 1518 | ND         | ND        | ND        | ND              |
| 925  |            | ND        |           |                 | 1576 |            | ND        | ND        | ND              |
| 953  |            | ND        | ND        |                 | 1589 |            |           |           |                 |
| 983  |            |           |           |                 | 1763 |            |           |           | ND              |
| 1024 |            |           |           |                 | 1780 |            | ND        | ND        | ND              |
| 1069 | ND         | ND        | ND        |                 | 1834 | ND         | ND        |           | ND              |
| 1140 |            |           |           |                 | 1851 | ND         |           | ND        | ND              |
| 1157 |            |           |           |                 | 1950 | ND         |           |           |                 |
| 1187 |            |           |           |                 | 2026 |            | ND        | ND        | ND              |
| 1228 |            |           |           |                 | 2039 | ND         |           |           |                 |
| 1256 | ND         |           |           | ND              | 2196 | ND         |           |           | ND              |
| 1286 | ND         |           |           | ND              | 2230 |            | ND        |           | ND              |
| 1269 |            | ND        | ND        | ND              | 2645 | ND         | ND        |           | ND              |
| 1316 | ND         |           |           | ND              |      |            |           |           |                 |
| 1331 |            |           |           |                 |      |            |           |           |                 |
| 1344 | ND         |           |           |                 |      |            |           |           |                 |
| 1402 |            |           |           | ND              |      |            |           |           |                 |

WT; wild type mice, C2GnT2 KO; C2GnT2 knockout mice, C2GnT3 KO, C2GnT3 knockout mice, C2GnT triple KO; C2GnT triple knockout mice, ND; not detected.

Key: GalNAc GlcNAc HexNAc Gal Man Fuc NeuAc NeuGc
